# Supplementary material for: Economics and Outcome After Hematopoietic Stem Cell Transplantation: A Retrospective Cohort Study
Source: PubMed Central journal article supplement — eBioMedicine. 2015 Nov 19;2(12):2101–9. doi: 10.1016/j.ebiom.2015.11.021 (PMC4703735; doi:10.1016/j.ebiom.2015.11.021), 2015-11-19
Supplement: mmc1.pdf [file mmc1.pdf]

## **Macroeconomics and Outcome after Hematopoietic Stem Cell Transplants**

**APPENDIX** final version V 1.0 August 4, 2015

### **List of participating centers**

This list includes all transplant teams contributing data of transplant patients during the years 1999 – 2006 (see methods section) to the analysis of macroeconomics and outcome after HSCT. Teams are listed in alphabetical order by country and city. Information is provided on Hospital name, type of patients (ads = adult; peds = pediatric) and type of main donor type (allogeneic, allogeneic and autologous or autologous).

Listed for each country are the number of teams contributing to the analysis and the number of teams participating in the EBMT activity surveys in 1999 and in 2013 respectively. (See Passweg et al Bone Marrow Transplant. 2015; 50(4):476-82)

### **Participating countries and teams**

#### *Austria:*

8 teams did contribute data for the analysis. 14 teams participated in the activity survey 1999, 12 teams in 2013.

Graz, University of Graz, ads, CIC 308, allogeneic and autologous  
Innsbruck, University Hospital, ads, peds, CIC 271, allogeneic and autologous  
Linz, AOKH der Elisabethinen, ads, CIC 594, allogeneic and autologous  
Salzburg, LKA Salzburg, ads, CIC 356, autologous  
Vienna, St. Anna Kinderspital, peds, CIC 528, allogeneic and autologous  
Vienna, Universitätsklinik für Innere Medizin-AKH, ads, CIC 227, allogeneic and autologous  
Vienna, Wilhelminenspital, ads, CIC 828, allogeneic and autologous  
Vienna, Hanusch-Krankenhaus, ads, CIC 743, autologous

#### *Belgium:*

13 teams did contribute data for the analysis. 25 teams participated in the activity survey 1999, 20 teams in 2013.

Antwerp, Stuivenberg ZH, ads, CIC 339, allogeneic and autologous  
Brussels, University Hospital, ads, peds, CIC 630, allogeneic and autologous  
Brussels, U.L.B. Hôpital Erasme, ads, CIC 596, allogeneic and autologous  
Brussels, Clinique Universitaire St. Luc, ads, peds, CIC 234, allogeneic and autologous  
Brugge, A.Z. St. Jan, ads, peds, CIC 506, allogeneic and autologous  
Brussels, Institut Jules Bordet, ads, peds, CIC 215, allogeneic and autologous  
Charleroi, Hopital Notre Dame, ads, CIC 349, allogeneic and autologous  
Gent, University Hospital, ads, peds, CIC 744, allogeneic and autologous  
Hasselt, Jessa Ziekenhuis, ads, CIC 632, autologous  
Leuven, University Hospital Gasthuisberg, ads, peds, CIC 209, allogeneic and autologous  
Liège, University Hospital Sart-Tilman, ads, peds, CIC 726, allogeneic and autologous  
Liège, CHR-Citadelle, ads, CIC 353, autologous  
Roeselare, H. Hart Ziekenhuis, ads, CIC 646, allogeneic and autologous

#### *Bulgaria:*

1 team did contribute data for the analysis. 1 team participated in the activity survey 1999, 2 teams in 2013.

Sofia, Ped. Hospital for Oncohematology and BMT, peds, CIC 346, allogeneic and autologous

*Croatia:*

1 team did contribute data for the analysis. 2 teams participated in the activity survey 1999, 3 teams in 2013.

Zagreb, University Hospital Rebro, ads, peds, CIC 302, allogeneic and autologous

*Czech Republic:*

7 teams did contribute data for the analysis. 10 teams participated in the activity survey 1999, 9 teams in 2013.

Brno, Masaryk University Hospital, ads, peds, CIC 597, allogeneic and autologous

Hradec Kralové, Charles University, ads, CIC 729, allogeneic and autologous

Olomouc, University Hospital, ads, CIC 574, allogeneic and autologous

Pilsen, Charles Hospital, ads, CIC 718, allogeneic and autologous

Prague, Charles University Vinohrady, ads, CIC 318, autologous

Prague, Charles University, ads, CIC 745, autologous

Prague, Institute of Hematology and Blood Transfusion, ads, CIC 6561, allogeneic and autologous

*Denmark:*

1 team did contribute data for the analysis. 3 teams participated in the activity survey 1999, 4 teams in 2013.

Copenhagen, Rigshospitalet, ads, peds, CIC 206, allogeneic and autologous

*Estonia:*

1 team did contribute data for the analysis. 1 team participated in the activity survey 1999, 2 teams in 2013.

Tartu, University Hospital, ads, peds, CIC 746, allogeneic and autologous

*Finland:*

8 teams did contribute data for the analysis. 6 teams participated in the activity survey 1999, 7 teams in 2013.

Helsinki, Oncology, University Hospital, ads, CIC 833, autologous

Helsinki, Children's Hospital, peds, CIC 219, allogeneic and autologous

Helsinki, Helsinki University Central Hospital, ads, CIC 515, allogeneic and autologous

Kuopio, University Hospital, ads, CIC 396, autologous

Oys Oulu, Oulu University Central Hospital, ads, CIC 690, autologous

Tampere, University Hospital, ads, peds, CIC 635, autologous

Turku, University Central Hospital, ads, peds, CIC 225, allogeneic and autologous

*France:*

55 teams did contribute data for the analysis. 83 teams participated in the activity survey 1999, 81 teams in 2013.

Amiens, CHU d'Amiens, ads, CIC 955, autologous  
Angers, Centre Hospitalier, ads, peds, CIC 650, allogeneic and autologous  
Argenteuil, Hôpital Victordupouy, CIC 199, autologous  
Besancon, Hopital Jean Minjot and St.Jacques, ads, peds, CIC 233, allogeneic and autologous  
Bobigny, Hopital Avicenne, CIC 945 ads, autologous  
Brest, Hopital Morvan, CHU de Brest, ads, allogeneic and autologous  
Caen, Cent. Reg. Francois Baclesse, CIC 951, ads, autologous  
Caen, Centre Hospitalier Régional, ads, CIC 251, allogeneic and autologous  
Clamart, Hopital Percy, ads, CIC 665, allogeneic and autologous  
Clermont Ferrand, CRCTCP, CHU Estaing, ads, peds, CIC 273, allogeneic and autologous  
Corbeil Essonne, Hopital Gilles de Corbeil, CIC 840, ads, autologous  
Créteil, Hopital H. Mondor, ads, CIC 252, allogeneic and autologous  
Dijon, Hopital des Enfants, ads, CIC 667, autologous  
Dunkerque, Centre Hospitalier, ads, CIC 964, autologous  
Grenoble, CHV Grenoble, ads, peds, CIC 270, allogeneic and autologous  
Limoges, CHU Dupuytren, ads, CIC 977, autologous  
Lille, Centre Hospitalier Saint Vincent, ads, CIC 991, autologous  
Lille, Hopital Claude Huriez, ads, CIC 277, allogeneic and autologous  
Lyon, Hopital Edouard Herriot, ads, CIC 671, allogeneic and autologous  
Lyon, Centre Léon Bérard, ads, CIC 241, autologous  
Lyon, Institue d'Hématologie et d'Oncologie Pédiatrique, peds, CIC 806, allogeneic and autologous  
Marseille, Inst. Paoli I. Calmettes, ads, CIC 230, allogeneic and autologous  
Marseille Hopital Timone, adds, CIC 192 allogeneic and autologous  
Meaux, Centre Hospitalier de Meaux, ads, CIC 194, autologous  
Montpellier, CHR Lapeyronie, ads, peds, CIC 926, allogeneic and autologous  
Mulhouse, Hopital du Hasenrain, ads, CIC 944, autologous  
Nancy, Hopital de Nancy, CIC 249, ads, autologous  
Nantes, Hotel Dieu, CHU Nantes, ads, peds, CIC 253, allogeneic and autologous  
Nice, Hopital de l'Archet 1, ads, peds, CIC 523, allogeneic and autologous  
Nice, Centre Antoine Lacassagne, ads, CIC 973, autologous  
Paris, Hôpital Cochin, ads, CIC 280, autologous  
Paris, Hotel Dieu, ads, CIC 222, allogeneic and autologous  
Paris, Institut Curie (ads, peds, onco), CIC 702, autologous  
Paris, Hôpital Pitié Salpêtrière, ads, CIC 262, allogeneic and autologous  
Paris, Hôpital Robert Debré, peds, CIC 631, allogeneic and autologous  
Paris, Hôpital St. Louis, ads, peds, CIC 969, autologous  
Paris, Hôpital St. Antoine, ads, peds, CIC 213, allogeneic and autologous  
Paris, Hôpital St. Louis (onco, ads), CIC 805, autologous  
Paris, Hôpital St. Louis, ads, peds, CIC 207, allogeneic  
Paris, Hôpital Necker, ads, peds, CIC 160, allogeneic and autologous  
Pessac, Hôpital du Haut Levêque, CHU Bordeaux, ads, CIC 267, allogeneic and autologous  
Pierre Benite, Centre Hospitalier Lyon-Sud, ads, CIC 901, autologous  
Pontoise, Hop. René Dubos, ads, CIC 961, H. Gonzalez (autologous)

Poitiers, CHU de Poitiers, Hôpital La Miletrie, ads, peds, CIC 264, allogeneic and autologous  
Rennes, Hôpital Pontchaillou, ads, CIC 661, allogeneic and autologous  
Reims, Hop. Robert Debré, ads, CIC 959, allogeneic and autologous  
Roubaix, Hopital V. Provo, ads, CIC 968, autologous  
Rouen, Centre Henri Becquerel, ads, CIC 941, allogeneic and autologous  
St. Cloud, Institut Curie, Hopital René Huguenin, ads, CIC 551, autologous  
St Etienne, Hopital de St. Etienne, ads, CIC 250, allogeneic and autologous  
Strasbourg, Hôpital de Hautepierre, ads, CIC 672, allogeneic and autologous  
Toulouse, Hôpital de Purpan, ads, CIC 624, allogeneic and autologous  
Tours, Hôpital Bretonneau, ads, peds, CIC 272, autologous  
Vandoeuvre-les-Nancy, Hôpital d'Enfants, CIC 676, ads, peds, allogeneic and autologous  
Villejuif, Institut Gustave Roussy, ads, CIC 666, allogeneic and autologous

*Germany:*

73 teams did contribute data for the analysis. 100 teams participated in the activity survey 1999, 109 teams in 2013.

Aachen, Universitätsklinikum, ads, CIC 348, autologous  
Augsburg, Klinikum Augsburg, ads, CIC 152, allogeneic and autologous  
Berlin, Charité, Campus Benjamin Franklin, ads, CIC 590, autologous  
Berlin Charité Mitte, ads, CIC 293, allogeneic and autologous  
Berlin, Charité Campus Virchow Klinikum, ads, CIC 807, allogeneic and autologous  
Berlin, Robert Rossle HELIOS Klinikum Berlin Buch, ads, CIC 518, autologous  
Bochum, Knappschafts Krankenhaus, ads, CIC 124, autologous  
Bonn, Universitätsklinikum, ads, CIC 134, autologous  
Braunschweig, Städtisches Klinikum, ads, CIC 674, autologous  
Bremen, Klinikum Bremen-Mitte, ads, CIC 602, allogeneic and autologous  
Bremen, Ev. Diakonie-Krankenhaus GmbH, ads, CIC 111, autologous  
Chemnitz, Klinikum Chemnitz GmbH, ads, CIC 104, autologous  
Cottbus, Carl-Thiem-Klinikum, ads, CIC 102, autologous  
Dresden, Universitätsklinikum Carl Gustav Carus, ads, peds, CIC 808, allogeneic and autologous  
Duisburg, HELIOS Klinikum Duisburg, ads, CIC 519, autologous  
Düsseldorf, Universitätsklinikum, peds, CIC 651, allogeneic and autologous  
Düsseldorf, Universitätsklinikum, ads, CIC 390, allogeneic and autologous  
Erlangen, Universitätsklinikum, ads, pds, CIC 809, allogeneic and autologous  
Essen, Universitätsklinikum, Innere Klinik, ads, CIC 127, autologous  
Essen, Universitätsklinikum, Hämatologie, ads, CIC 126, autologous  
Essen, Evangelisches Krankenhaus Essen-Werden GmbH, ads, CIC 784, allogeneic and autologous)  
Essen, Universitätsklinikum, Klinik f. KMT, ads, peds, CIC 259,  
Frankfurt, J. W. Goethe Universität, peds, CIC 138, allogeneic and autologous  
Frankfurt, J. W. Goethe Universität, ads, CIC 297, allogeneic and autologous  
Freiburg, Universitätsklinikum, ads, peds, CIC 810, allogeneic and autologous  
Göttingen, Universitätsklinikum, ads, CIC 552, allogeneic and autologous  
Greifswald, Universitätsklinikum, ads, CIC 530, allogeneic and autologous  
Hagen, St. Marien Hospital, ads, CIC 536, autologous  
Halle, Universitätsklinikum, ads, CIC 338, allogeneic and autologous  
Hamburg, Asklepios Klinik Altona, ads, CIC 366, autologous  
Hamburg, UKE, II. Med. Klinik, ads, CIC 673, autologou

Hamburg, Asklepios Klinik St. Georg, ads, CIC 153, allogeneic and autologous  
Hamburg, UKE, Stammzelltransplantation, ads, peds, CIC 614, allogeneic and autologous  
Hameln, Sana Klinikum Hameln-Pyrmont, ads, CIC 112, allogeneic and autologous  
Hamm, Ev. Krankenhaus, ads, CIC 509, autologous  
Hannover, Medizinische Hochschule, ads, peds, CIC 295, allogeneic and autologous  
Heidelberg, Universitätsklinikum, ads, peds, CIC 524,  
Homburg/Saar, Universität des Saarlandes, ads, peds, CIC 785, allogeneic and autologous  
Idar-Oberstein, Klinik für KMT, ads, peds, CIC 592, allogeneic and autologous  
Jena, Universitätsklinikum, ads, CIC 533, allogeneic and autologous  
Jena, FS Universitäts-Kinderklinik, peds, CIC 750, allogeneic and autologous  
Karlsruhe, Städt. Klinikum, ads, CIC 290, autologous  
Kiel, Universitätsklinikum Schleswig-Holstein, ads, peds, CIC 256, allogeneic and autologous  
Köln, Universitätsklinikum, ads, peds, CIC 534, allogeneic and autologous  
Leipzig, Universitätsklinikum, ads, CIC 389, allogeneic and autologous  
Lübeck, Universitätsklinikum Schleswig Holstein, ads, peds, CIC 367, allogeneic and autologous  
Ludwigshafen, Klinikum, ads, CIC 140, autologous  
Magdeburg, Universitätsklinikum, ads, CIC 359, autologous  
Mainz, Universitätsklinikum, ads, CIC 786, allogeneic and autologous  
Mannheim, Universitätsklinikum, ads, CIC 142, autologous  
Marburg, Universitätsklinikum, ads, CIC 645, allogeneic and autologous  
Möchengladbach, Kliniken Maria Hilf, ads, CIC 120, autologous  
Munich, Universitätsklinikum Grosshadern, ads, peds, CIC 513, allogeneic and autologous  
Munich, Klinikum Innenstadt der LMU, ads, CIC 148, autologous  
Munich, Klinikum Rechts der Isar, ads, CIC 558, allogeneic and autologous  
Munich, SKH München-Harlaching, ads, CIC 664, autologous  
Münster, W.-W Universitätsklinikum, ads, CIC 680, allogeneic and autologous  
Münster, Universitätsklinikum Münster, peds, CIC 505, allogeneic and autologous  
Nürnberg, Klinikum Nord, ads, CIC 625, allogeneic and autologous  
Oldenburg, Universitätsklinikum, ads, CIC 749, autologous  
Potsdam, Klinikum Ernst von Bergmann, ads, CIC 106, autologous  
Regensburg, Universitätsklinikum, ads, peds, CIC 787, allogeneic and autologous  
Rostock, Universitätsklinikum, ads, CIC 585, allogeneic and autologous  
Siegen, St. Marien-Krankenhaus, ads, CIC 135, autologous  
Stuttgart, Bürgerhospital, Diakonie-Klinikum, ads, CIC 144, autologous  
Stuttgart, Robert Bosch Krankenhaus, ads, CIC 145, allogeneic and autologous  
Stuttgart, Katharinenhospital, ads, CIC 143, allogeneic and autologous  
Tübingen, Universitätsklinikum, ads, CIC 223, allogeneic and autologous  
Tübingen, Universitätsklinikum, peds, CIC 535, allogeneic and autologous  
Ulm, Universitätsklinikum, ads, peds, CIC 204, allogeneic and autologous  
Wiesbaden, Dr. Horst Schmidt Kliniken, ads, CIC 586, autologous  
Wiesbaden, Deutsche Klinik für Diagnostik, ads, CIC 311, allogeneic and autologous  
Würzburg, Universitätsklinikum, ads, CIC 712, allogeneic and autologous

*Greece:*

6 teams did contribute data for the analysis. 11 teams participated in the activity survey 1999, 14 teams in 2013.

Athens, Hellenic Cancer Institute St. Savas, ads, CIC 751, allogeneic and autologous  
Athens, Aghia Sophia Childrens Hospital, peds, CIC 752, allogeneic and autologous

Athens, Evangelismos Hospital, ads, CIC 622, allogeneic and autologous  
Athens, Laikon General Hospital, ads, CIC 328, autologous  
Patras, University Medical School Hospital, ads, CIC 281, allogeneic and autologous  
Thessaloniki, The George Papanicolaou General Hospital, ads, peds, CIC 561, allogeneic and autologous

*Hungary:*

5 teams did contribute data for the analysis. 4 teams participated in the activity survey 1999, 5 teams in 2013.

Budapest, St Istvan & St. Lazlo Hospitals, ads, peds, CIC 739 allogeneic and autologous  
Budapest, National Medical Center, ads CIC 504 allogeneic and autologous  
Budapest national Med Center ads, CIC 556, allogeneic and autologous  
Debrecen, University of Debrecen, ads, CIC 648, autologous  
Pécs, University of Pécs, ads, CIC 682, autologous

*Ireland:*

2 teams did contribute data for the analysis. 3 teams participated in the activity survey 1999, 4 teams in 2013.

Dublin, St.James Hospital, ads, CIC 257, allogeneic and autologous  
Dublin, Our Lady's Hospital of Sick Children, Crumlin, peds, CIC 774, allogeneic and autologous

*Israel:*

7 teams did contribute data for the analysis. 5 teams participated in the activity survey 1999, 9 teams in 2013.

Haifa, Rambam Medical Center, ads, peds, CIC 345, allogeneic and autologous  
Jerusalem, Hadassah University Hospital, ads, peds, CIC 258, allogeneic and autologous  
Petach-Tikvah, Schneider Childrens Hospital, peds, CIC 755, allogeneic and autologous  
Revohot, Kaplan Hospital, ads, CIC 327, autologous  
Tel Hashomer, Sheba Medical Center, ads, CIC 754, allogeneic and autologous  
Tel Aviv, Tel Aviv Sourasky Medical Center, ads, peds, CIC 161, allogeneic and autologous  
Tel Hashomer, Chaim Sheba Medical Center, peds, CIC 572, allogeneic and autologous

*Italy:*

71 teams did contribute data for the analysis. 95 teams participated in the activity survey 1999, 103 teams in 2013.

Alessandria, S.S. Antonio e Biagio e C. Arrigo, ads, CIC 825, allogeneic and autologous  
Ancona, Ancona University, ads, CIC 788, allogeneic and autologous  
Ascoli Piceno, Mazzoni Hospital, ads, CIC 119, allogeneic and autologous

Aviano, CRO Aviano, ads, CIC 162, autologous  
Bari, Università degli Studi di Bari, ads, CIC 649, allogeneic and autologous  
Bergamo, Azienda Ospedaliera Papa Giovanni XXIII, ads, peds, CIC 658, allogeneic and autologous  
Bologna, Hospital St. Orsola, ads, CIC 240, allogeneic and autologous  
Bologna, Poli. S. Orsola, peds, CIC 790, allogeneic and autologous  
Bolzano, Ospedale S. Maurizio, ads, CIC 299, allogeneic and autologous  
Brescia, Azienda Spedali Civili, ads, CIC 288, autologous  
Cagliari, Ospedale A. Businco, ads, CIC 791, allogeneic and autologous  
Cagliari, Binaghi BMT Centre, ads, peds, CIC 811, allogeneic and autologous  
Candiolo, Istituto Ricerca Cancro, ads, CIC 377, (allogeneic and autologous)  
Catania, Ospedale Ferrarotto, University of Catania, ads, CIC 792, allogeneic and autologous  
Cremona, Ospedale Maggiore, ads, CIC 226, autologous  
Cuneo, Azienda Ospidaliere "S. Croce e Carle", ads, CIC 606, allogeneic and autologous  
Ferrara, University of Ferrara, ads, CIC 330, autologous  
Florence, Policlinico di Careggi, ads, peds, CIC 304, allogeneic and autologous  
Genova, Ospedale S. Martino, ads, CIC 217, allogeneic and autologous  
Genova, Istituto Giannina Gaslini, peds, CIC 274, allogeneic and autologous  
Genova, University of Genova, ads, CIC 139, autologous  
Latina, Ospedale S. Maria Goretti, ads, CIC 379, autologous  
Milan, Istituto Scientifico H.S. Raffaele, ads, peds, CIC 813, allogeneic and autologous  
Milan, University of Milan IRCCS, ads, CIC 265, allogeneic and autologous  
Milan, Ist. Nazionale Tumori di Milano, ads, peds, CIC 616, allogeneic and autologous  
Milan, Ospedale di Niguarda, ads, CIC 294, allogeneic and autologous  
Milan, Istituto Europeo di Oncologia, ads, CIC 331, allogeneic and autologous  
Milan, 1st. Clinico Humanitas, ads, CIC 354, allogeneic and autologous  
Modena, University of Modena, ads, peds, CIC 543, allogeneic and autologous  
Monza, Ospedale S. Gerardo de' Tintori, Uni. Di Milano-Bicocca, ads, CIC 544, allogeneic and autologous  
Monza, Ospedale San Gerardo, ads, peds, CIC 279, allogeneic and autologous  
Naples, Cardarelli Hospital, peds, CIC 837, autologous  
Naples, Cardarelli Hospital, ads, CIC 607, allogeneic and autologous  
Naples, National Cancer Institute, ads, CIC 839, autologous  
Naples, Federico II University, ads, CIC 766, allogeneic and autologous  
Naples, Rilievo Nazionale, ads, CIC 341, allogeneic and autologous  
Padova, Centro Leucemie Infantili, peds, CIC 285, allogeneic and autologous  
Palermo, Uni delgi Studi di Palermo, ads, CIC 814, allogeneic and autologous  
Palermo, Ospedale V. Cervello-USL 60, ads, CIC 392, allogeneic and autologous  
Palermo, Ospedale 'La Maddalena', ads, CIC 692, allogeneic and autologous  
Parma, Università degli studi, ads, CIC 245, allogeneic and autologous  
Pavia, IRCCS Policlinico S. Matteo, ads, CIC 286, allogeneic and autologous  
Pavia, Policlinico IRCCS St. Matteo, peds, CIC 557, allogeneic and autologous  
Pescara, Ospedale Civile, ads, peds, CIC 248, allogeneic and autologous  
Pesaro, Ospedale San Salvatore, ads, peds, CIC 529, allogeneic and autologous  
Perugia, Ospedale Santa Maria della Misericordia, ads, peds, CIC 794, allogeneic and autologous  
Perugia, Università oncologia, ads, CIC 573, autologous  
Piacenza, Ospedale Civile, ads, CIC 163, allogeneic and autologous  
Pisa, University of Pisa, ads, peds, CIC 795, allogeneic and autologous  
Pisa, oncologia e trapianti, ads, CIC 132, allogeneic and autologous  
Ravenna, Ospedale Civile, ads, CIC 306, autologous

Reggio Emilia, Arcispedale S. Maria Nuova, ads, CIC 660, allogeneic and autologous  
Reggio di Calabria, Azienda Ospedale " Riuniti e Morelli", ads, peds, CIC 587, allogeneic and autologous  
Rimini, Ospedale Infermi Rimini, ads, CIC 865, autologous  
Rome, Rome Transplant Network, ads, CIC 756, allogeneic and autologous  
Rome, Università " La Sapienza", ads, peds, CIC 232, allogeneic and autologous  
Rome, Università Cattolica San Cuore, ads, CIC 307, allogeneic and autologous  
Rome, Ospedale S. Camillo, ads, peds, CIC 287, allogeneic and autologous  
Rome, San Giovanni, ads, CIC 948, autologous  
Sassari, Università Di Sassari, ads, CIC 870, autologous  
San Giovanni Rotondo, Hospital Casa Sollievo Sofferenza, ads, CIC 526, allogeneic and autologous  
Siena, Ospedale Sclavo, ads, CIC 321, allogeneic and autologous  
Taranto, Institute of Haematologie, Ospedale Nord, ads, CIC 332, allogeneic and autologous  
Torino, Ospedale Maggiore S. G. Battista, ads, CIC 231, allogeneic and autologous  
Torino, University Hospital, ads, peds, CIC 305, allogeneic and autologous  
Torino, Ospedale San Giovanni, ads, CIC 696, allogeneic and autologous  
Torino, San Luigi Urbassano, ads, CIC 378, allogeneic and autologous  
Udine, Policlinico Universitario & General Hospital, ads, CIC 705, allogeneic and autologous  
Venice, Ospedale dell'Angelo, ads, CIC 502, allogeneic and autologous  
Verona, Policlinico G. B. Rossi, ads, peds, CIC 623, allogeneic and autologous  
Vicenza, Ospedale S. Bortolo, ads, CIC 797, allogeneic and autologous

*Lithuania:*

1 team did contribute data for the analysis. 1 team participated in the activity survey 1999, 2 teams in 2013.

Vilnius, Santariskiu Klinikos, ads, CIC 644, allogeneic and autologous

*Netherlands:*

13 teams did contribute data for the analysis. 14 teams participated in the activity survey 1999, 15 teams in 2013.

Amsterdam, Academic Med Centre, ads, peds, CIC 247, allogeneic and autologous  
Amsterdam, VU University Medical Center, ads, peds, CIC 588, allogeneic and autologous  
Amsterdam, Antoni Van Leeuwenhoek Cancer Institute, ads, CIC 976, autologous  
Enschede, Medisch Spectrum Twente, ads, CIC 360, autologous  
Groningen, University Hospital, ads, CIC 546, allogeneic and autologous  
The Hague, Haga Hospital, ads, CIC 547, autologous  
Leiden, University Hospital, ads, peds, CIC 203, allogeneic and autologous  
Maastricht, University Hospital, ads, CIC 565, allogeneic and autologous  
Nieuwegein, St. Antonius Hospital, ads, CIC 200, autologous  
Nijmegen, University Hospital, ads, CIC 237, allogeneic and autologous  
Rotterdam, Dr. Daniel den Hoed Cancer Center, ads, CIC 246, allogeneic and autologous  
Utrecht, University Hospital UMCU, ads, peds, CIC 239, allogeneic and autologous  
Zwolle, Sophia Ziekenhuis, ads, CIC 548, autologous

*Norway:*



1 team did contribute data for the analysis. 5 teams participated in the activity survey 1999, 5 teams in 2013.

Oslo, Oslo University Hospital, ads, peds, CIC 235, allogeneic and autologous

*Poland:*

14 teams did contribute data for the analysis. 13 teams participated in the activity survey 1999, 18 teams in 2013.

Gdansk, Medical University, ads, CIC 799, allogeneic and autologous

Katowice, Silesian Medical Academy, ads, CIC 677, allogeneic and autologous

Lodz, Med. University of Lodz, ads, CIC 171, autologous

Lublin, University Medical School, ads, CIC 695, allogeneic and autologous

Lublin, Dzieciocy Szpital Kliniczny, peds, CIC 678, allogeneic and autologous

Poznan, Medical Academy, ads, CIC 730, allogeneic and autologous

Poznan, Institute of Pediatrics, peds, CIC 641, allogeneic and autologous

Warsaw, Institute Haem+ Blood Transfusion, ads, CIC 693, allogeneic and autologous

Warsaw, Central Hospital Military Medical Academy, ads, CIC 816, allogeneic and autologous

Warsaw, Marie Curie Institute, ads, CIC 800, allogeneic and autologous

Warsaw, Central Clinical Hospital, ads, CIC 954, allogeneic and autologous

Wroclaw, University of Medicine, peds, CIC 817, allogeneic and autologous

Wroclaw, Medical Academy, ads, CIC 699, allogeneic and autologous

Wroclaw, Lower Silesian Cent. / BM Donor Registry, ads, CIC 538, allogeneic and autologous

*Portugal:*

4 teams did contribute data for the analysis. 7 teams participated in the activity survey 1999, 6 teams in 2013.

Lisbon, Instituto Portugues de Oncologia, ads, peds, CIC 300, allogeneic and autologous

Lisbon, H. St. Antonio dos Capuchos, ads, CIC 826, autologous

Porto, Instituto Portugues de Oncologia, ads, peds, CIC 291, allogeneic and autologous

Porto, Hospital St. Joao, ads, CIC 329, autologous

*Russia:*

2 teams did contribute data for the analysis. 14 teams participated in the activity survey 1999, 14 teams in 2013.

Moscow, Fed. Research Cent. Ped Hematology, peds, CIC 694, allogeneic and autologous

Novosibirsk, Institue. Clinical Immunolgy, CIC 376, allogeneic and autologous

St. Petersburg, Pavlov Medical University, ads, peds, CIC 725, allogeneic and autologous

*Serbia and Montenegro:*

1 team did contribute data for the analysis. 4 teams participated in the activity survey 1999, 4 teams in 2013.

Belgrade, Military Medical Academy, ads, CIC 582, allogeneic and autologous

*Slovakia:*

3 teams did contribute data for the analysis. 4 teams participated in the activity survey 1999, 5 teams in 2013.

Banská Bystrica, Roosevelt Hospital, ads, CIC 333, allogeneic and autologous  
Bratislava, 2nd. Childrens Clinic, University Hospital, peds, CIC 684, allogeneic and autologous  
Bratislava, University Hospital, ads, CIC 610, allogeneic and autologous

*Slovenia:*

(1 team did contribute data for the analysis. 1 team participated in the activity survey 1999, 1 team in 2013.

Ljubljana, University Medical Centre, ads, peds, CIC 640, allogeneic and autologous

*Spain:*

33 teams did contribute data for the analysis. 76 teams participated in the activity survey 1999, 74 teams in 2013.

Barakaldo Vizcaya, Hospital de Cruces, ads, CIC 393, autologous  
Barcelona, Santa Creu i San Pau, ads, peds, CIC 260, allogeneic and autologous  
Barcelona, Inst. Catala d'Oncologia, Hosp. Duran i Reynals, ads, CIC 759, allogeneic and autologous  
Barcelona, Hospital Clinic, ads, CIC 214, allogeneic and autologous  
Barcelona, Hosp Germans Trias i Pujol, ads, CIC 613, allogeneic and autologous  
Cadiz, Hosp. Uni. Puerta del Mar, ads, CIC 679, allogeneic and autologous  
Cadiz, Hospital de Jerez, ads, peds, CIC 612, allogeneic and autologous  
Cordoba, Hospital Reina Sofia, ads, peds, CIC 238, allogeneic and autologous  
Galdakao, Hospital de Galdakao, ads, CIC 975, autologous  
Granada, Hospital Virgen de la Nieves, ads, CIC 559, allogeneic and autologous  
La Laguna Canary Isles, University Hospital of the Canary Isles, ads, peds, CIC 855, autologous  
Las Palmas Canary Isles, Hospital Insular, ads, CIC 335, autologous  
Las Palmas Canary Isles, Hospital Univ. de Gran Canaria 'Dr. Negrin', ads, CIC 537, allogeneic and autologous  
Madrid, Hospital La Paz, ads, CIC 734, allogeneic and autologous  
Madrid, Hospital General Universitario Gregorio Maranon, ads, peds, CIC 819, allogeneic and autologous  
Madrid, Hospital Universitario Puerta de Hierro, ads, CIC 728, allogeneic and autologous  
Madrid, Hospital de la Princesa, ads, CIC 236, allogeneic and autologous  
Madrid, Hospital Ramon y Cajal, ads, CIC 615, allogeneic and autologous  
Madrid, Hospital Niño Jesus, peds, CIC 732, allogeneic and autologous  
Madrid, Hospital La Paz, peds, CIC 734, allogeneic and autologous  
Malaga, Carlos Haya Hospital, ads, peds, CIC 576, allogeneic and autologous  
Murcia, Hospital General Universitario Morales Meseguer, ads, peds, CIC 735, allogeneic and autologous  
Oviedo, Hospital Covadonga, Central Asturias, ads, peds, CIC 642, allogeneic and autologous  
Palma de Mallorca, Hospital Uni. Son Espases (Son Dureta), ads, peds, CIC 722, allogeneic and autologous

Pamplona, Hospital de Navarra, ads, peds, CIC 577, autologous  
Salamanca, Complejo Hospital, ads, peds, CIC 727, allogeneic and autologous  
Santander, Hospital Universitario M. de Valdecilla, ads, peds, CIC 242, allogeneic and autologous  
San Sebastian, Hospital Nostra Senora de Aranzazu, ads, peds, CIC 598, allogeneic and autologous  
Sevilla, Hospital Universitario Virgen del Rocio, ads, peds, CIC 769, allogeneic and autologous  
Valencia, Hospital Universitario La Fe, peds, CIC 653, allogeneic and autologous  
Valencia, Hospital Clinico Universitario, ads, peds, CIC 282, allogeneic and autologous  
Valencia, Hospital Universitario La Fe, ads, CIC 663, allogeneic and autologous  
Zaragoza, Clin. Universitario Lozano Blesa, ads, CIC 531, autologous

*Sweden:*

8 teams did contribute data for the analysis. 10 teams participated in the activity survey 1999, 7 teams in 2013.

Goteborg, CHECT Sahlgrenska University Hospital, ads, peds, CIC 289, allogeneic and autologous  
Huddinge Hospital, ads, peds, CIC 212, allogeneic and autologous  
Linköping, University Hospital, ads, CIC 740, allogeneic and autologous  
Lund, University Hospital, ads, peds, CIC 283, allogeneic and autologous  
Örebro, Medical Center Hospital, ads, CIC 738, autologous  
Stockholm, Karolinska University Hospital, ads, peds, CIC 626, allogeneic and autologous  
Umea, Umea University Hospital, ads, CIC 731, allogeneic and autologous  
Uppsala, University Hospital, ads, peds, CIC 266, allogeneic and autologous

*Switzerland:*

9 teams did contribute data for the analysis. 12 teams participated in the activity survey 1999, 9 teams in 2013.

Aarau, Kantonsspital Aarau, ads, CIC 316, autologous  
Basel, Universitätsspital Basel, ads, peds, CIC 202, allogeneic and autologous  
Bellinzona, Ospedale San Giovanni, ads, CIC 829, autologous  
Bern, Inselspital, ads, peds, CIC 221, autologous  
Geneva, Hôpital Cantonal Universitaire, ads, peds, CIC 261, allogeneic and autologous  
Lausanne, CHUV, ads, CIC 820, autologous  
St. Gallen, Kantonsspital, ads, CIC 324, autologous  
Zurich, University Hospital, ads, CIC 208, allogeneic and autologous  
Zurich, Universitäts Kinderklinik, peds, CIC 334, allogeneic and autologous

*Turkey:*

12 teams did contribute data for the analysis. 21 teams participated in the activity survey 1999, 49 teams in 2013.

Ankara, Numune Education + Research Hospital, ads, CIC 691, allogeneic and autologous  
Ankara, Gazi University, Besevler, ads, CIC 169, allogeneic and autologous  
Ankara, Uni School of Medicine, Cebeci, ads, CIC 617, allogeneic and autologous

Ankara, Hacettepe University Medical School, Sihhiye, ads, CIC 168, allogeneic and autologous  
Ankara, GATA BMT Center, Etlik, ads, peds, CIC 372, allogeneic and autologous  
Antalya, Akdeniz University Hospital (hem, peds), CIC 618, allogeneic and autologous  
Eskisehir, Osmangazi University, ads, CIC 686, allogeneic and autologous  
Istanbul, Cerrahpasa Medical School, ads, CIC 761, allogeneic and autologous  
Istanbul, University of Istanbul, ads, CIC 760, allogeneic and autologous  
Izmir, Ege University, Bornova, ads, CIC 628, allogeneic and autologous  
Kayseri, Erciyes University Hospital, ads, CIC 627, allogeneic and autologous  
Trabzon, Karadeniz Technical University, ads, CIC 170, allogeneic and autologous

*United Kingdom / Great Britain:*

43 teams did contribute data for the analysis. 55 teams participated in the activity survey 1999, 52 teams in 2013.

Aberdeen, The Royal Infirmary, ads, CIC 344, allogeneic and autologous)  
Bangor, Ysbyty Gwynedd, ads, CIC 736, autologous  
Bath, Royal United Hospital, ads, CIC 619, autologous  
Belfast, Belfast City Hospital Trust, ads, CIC 268, allogeneic and autologous  
Birmingham, The Birmingham Children's Hospital, peds, CIC 781, allogeneic and autologous  
Birmingham, Queen Elizabeth Hospital, ads, CIC 387, allogeneic and autologous  
Birmingham, Heartlands Hospital, ads, CIC 284, allogeneic and autologous  
Bournemouth, Royal Bournemouth Hospital, ads, CIC 765, autologous  
Bristol, Avon and Royal Hospital for Sick Children, ads, peds, CIC 386, allogeneic and autologous  
Cambridge, Addenbrooke's Hospital, ads, CIC 566, allogeneic and autologous  
Cardiff/Swansea, University Hospital of Wales, ads, peds, CIC 303, allogeneic and autologous  
Cheltenham, Cheltenham General Hospital, ads, CIC 398, autologous  
Coventry, University Hospital & Warwickshire NHS Trust, ads, CIC 322, autologous  
Dundee, Ninewells Hospital, ads, CIC 719, autologous  
Edinburgh, The Western General Hospital, ads, CIC 228, allogeneic and autologous  
Exeter, Royal Devon and Exeter Hospital, ads, CIC 571, autologous  
Glasgow, Royal Hospital for Sick Children, peds, CIC 707, allogeneic and autologous  
Glasgow, Beatson, West of Scotland Cancer Centre, ads, peds, CIC 244, allogeneic and autologous  
Leeds, St. James's University Hospital and The General Infirmary, ads, peds, CIC 254, allogeneic and autologous  
Leicester, Royal Infirmary Hospital, ads, CIC 713, allogeneic and autologous  
Liverpool, Royal Liverpool University Hospital, ads, CIC 501, allogeneic and autologous  
London, Hammersmith Hospitals NHS Trust, ads, CIC 205, allogeneic and autologous  
London, The London Clinic, ads, CIC 263, allogeneic and autologous  
London, St. George's Hospital, ads, CIC 539, allogeneic and autologous  
London, University College Hospital, ads, peds, CIC 224, allogeneic and autologous  
London, King's College Hospital, ads, CIC 763, allogeneic and autologous  
London, Royal Marsden Hospital, ads, peds, CIC 218, allogeneic and autologous  
London, The Royal Free Hospital, ads, CIC 216, allogeneic and autologous  
London, St. Bartholomew's and the Royal London Hospital, ads, CIC 768, allogeneic and autologous  
London, Great Ormond Street Hospital, peds, CIC 243, allogeneic  
London, Guy's Hospital, ads, CIC 721, allogeneic and autologous

Manchester, Christie Hospital, ads, peds, CIC 780, allogeneic and autologous  
Manchester, Royal Children's Hospital, peds, CIC 521, allogeneic and autologous  
Manchester, The Royal Infirmary, ads, CIC 601, allogeneic and autologous  
Newcastle upon Tyne, Freeman Hospital, ads, peds, CIC 276, allogeneic and autologous  
Norwich, Norfolk+Norwich Hosp., ads, CIC 391, autologous  
Nottingham, Nottingham City Hospital, ads, CIC 717, allogeneic and autologous  
Oxford, Churchill, Stoke Manderville Hospitals, ads, CIC 255, allogeneic and autologous  
Plymouth, Derriford Hospital, ads, CIC 823, allogeneic and autologous  
Sheffield, Teaching Hospitals NHS Trust, Children's Hospital, ads, peds, CIC 778, allogeneic and autologous  
Southampton, CRC Wessex, ads, peds, CIC 704, allogeneic and autologous  
Stoke-on-Trent, University Hospital of North Staffordshire, ads, CIC 394, autologous  
Taunton, Musgrove Park, ads, CIC 708, allogeneic and autologous

### **Comments:**

Role of the activity survey:

European and some additional Non-European Teams report annually early in the year the numbers of their hematopoietic stem cell transplants (HSCT) by main indication, donor type and stem cell source to the EBMT activity survey. Hence these data provide an overview of all HSCT performed during the past year. According to selected audits and information from the national organizations, about 95% of all allogeneic HSCT and about 90% of all autologous HSCT are reported to the EBMT activity survey.

Selected teams report as well outcome data of their transplants to the EBMT PROMISE database. These teams, contributing outcome data for their patients transplanted in 1999 – 2006 are listed as explained above.

Note, not all teams did report every year continuously. Note that some teams stopped performing transplants, joined with other teams to form one team or did split up to two or more separate teams. Note that type of transplants (allogeneic or autologous) is given for the years 1999-2006; some teams might have changed their activity since.

Proportion of transplants reported in the manuscript:

As is recognized by the list, not all teams in all countries did contribute to the analysis. In some countries, it did reach 100%, in others rather a small proportion. Overall, the manuscript describes 102'549 transplants (37'542 allogeneic, 37%; 65'007 autologous, 63%) performed for hematological malignancies and reported to the EBMT database. This corresponds to 71% of the 145'185 transplants reported to the activity survey by the 704 teams participating during this time period to the activity survey. It corresponds to 75% of the 50'174 allogeneic (35%) and 68% of the 95'011 autologous (65%) HSCT. However, the described patients correspond to 93% of all transplants (N= 110'858) reported by the 404 participating teams in the activity survey for malignant hematological disorders, 95% of all allogeneic (N= 39'518) and 91% of all autologous (N= 71'340) HSCT.
